# Supplementary material for: Identification and Characterization of Argonaute Protein, Ago2 and Its Associated Small RNAs in Schistosoma japonicum
Source: PLoS Negl Trop Dis. 2012 Jul 31;6(7):e1745. doi: 10.1371/journal.pntd.0001745 (PMC3409120; doi:10.1371/journal.pntd.0001745)
Supplement: Table S3 — Proteins identified by Orbitrap MS in different immunoprecipitates. (XLS) [file pntd.0001745.s007.xls]

## Sheet: Sheet1
Table S3. Proteins identified by Orbitrap MS in different immunoprecipitates
	Proteins								Peptide (Hits)a
~90-115kDa
Mock-IP
1	gnl|lsbi|CPRT0000004184 Sjc_0044460|Sjp_0044460|SJC_S000371.120926 SJC_S000371.130293|Major vault protein (MVP),putative|Auto								36
2	gnl|lsbi|CPRT0000004202 Sjc_0044660|Sjp_0044660|SJC_S000376.59674 SJC_S000376.61833|HSP90AA1, HSPC1, HSPCA; heat shockprotein 90kDa alpha (cytosolic), class A member 1; ko:K04079 molecularchaperone HtpG, putative|Auto								23
3	gnl|lsbi|CPRT0000004387 Sjc_0046600|Sjp_0046600|SJC_S000409.151803 SJC_S000409.165260|Gaa; glucosidase, alpha, acid[EC:3.2.1.20]; ko:K01187 alpha-glucosidase, putative|Auto								14
4	gnl|lsbi|CPRT0000002677 Sjc_0028390|Sjp_0028390|SJC_S000176.2586 SJC_S000176.62231|expressed protein, putative|Auto								14
5	gnl|lsbi|CPRT0000005218 Sjc_0055410|Sjp_0055410|SJC_S000570.156339 SJC_S000570.181124|Granulins precursor (Proepithelin)(PEPI)								11
6	gnl|lsbi|CPRT0000007855 Sjc_0083460|Sjp_0083460|SJC_S001708.6042 SJC_S001708.33983|glucan phosphorylase [EC:2.4.1.1];ko:K00688 starch phosphorylase, putative|Auto								10
7	gnl|lsbi|CPRT0000010198 Sjc_0108340|Sjp_0108340|SJC_S005644.5832 SJC_S005644.7354|Lysosomal alpha-glucosidase precursor(EC 3.2.1.20) (Acid maltase), putative|Auto								10
8	gnl|lsbi|CPRT0000008908 Sjc_0094720|Sjp_0094720|SJC_S002677.1428 SJC_S002677.19383|Proactivator polypeptide precursor[Contains: Saposin A (Protein A);								9
9	tr|Q5C3C4|Q5C3C4_SCHJA SJCHGC05525 protein (Fragment) OS=Schistosoma japonicum PE=2 SV=2								9
10	gnl|lsbi|CPRT0000000689 Sjc_0007330|Sjp_0007330|SJC_S000023.398399 SJC_S000023.398995|Heat shock protein 83,putative|Auto								7
11	tr|Q5BZG5|Q5BZG5_SCHJA SJCHGC05582 protein (Fragment) OS=Schistosoma japonicum PE=2 SV=2								6
12	gnl|lsbi|CPRT0000008084 Sjc_0085890|Sjp_0085890|SJC_S001834.8996 SJC_S001834.17717|TER94; ko:K01509adenosinetriphosphatase, putative|Auto								6
13	gnl|lsbi|CPRT0000001131 Sjc_0012140|Sjp_0012140|SJC_S000050.345631 SJC_S000050.348383|T05E11.3; ko:K09487 heat shockprotein 90kDa beta, putative|Auto								6
14	gnl|lsbi|CPRT0000012071 Sjc_0131820|Sjp_0131820|SJC_S026108.3896 SJC_S026108.11746|hspa4; heat shock protein 4; ko:K09485heat shock protein 110kDa, putative|Auto								6
15	gnl|lsbi|CPRT0000004594 Sjc_0048760|Sjp_0048760|SJC_S000444.14563 SJC_S000444.29338|CDase; Ceramidase; ko:K01441N-acylsphingosine amidohydrolase, putative|Auto								5
16	gnl|lsbi|CPRT0000000402 Sjc_0004280|Sjp_0004280|SJC_S000011.654138 SJC_S000011.655580|Tuba1; tubulin, alpha 1; ko:K07374tubulin, alpha, putative|Auto								4
17	gnl|lsbi|CPRT0000006131 Sjc_0065210|Sjp_0065210|SJC_S000809.251986 SJC_S000809.345853|Ankyrin-2 (Brain ankyrin)(Ankyrin-B) (Ankyrin, nonerythroid), putative|Auto								4
18	gnl|lsbi|CPRT0000000648 Sjc_0006900|Sjp_0006900|SJC_S000022.143030 SJC_S000022.159217|Acsl4; acyl-CoA synthetaselong-chain family member 4 [EC:6.2.1.3]; ko:K01897 long-chainfatty-acid-CoA ligase, putative|Auto								4
moIgG-IP
1	gnl|lsbi|CPRT0000004184 Sjc_0044460|Sjp_0044460|SJC_S000371.120926 SJC_S000371.130293|Major vault protein (MVP),putative|Auto								25
2	gnl|lsbi|CPRT0000004202 Sjc_0044660|Sjp_0044660|SJC_S000376.59674 SJC_S000376.61833|HSP90AA1, HSPC1, HSPCA; heat shockprotein 90kDa alpha (cytosolic), class A member 1; ko:K04079 molecularchaperone HtpG, putative|Auto								19
3	gnl|lsbi|CPRT0000004387 Sjc_0046600|Sjp_0046600|SJC_S000409.151803 SJC_S000409.165260|Gaa; glucosidase, alpha, acid[EC:3.2.1.20]; ko:K01187 alpha-glucosidase, putative|Auto								12
4	gnl|lsbi|CPRT0000003373 Sjc_0035730|Sjp_0035730|SJC_S000251.218292 SJC_S000251.242715|zip; zipper; ko:K01509adenosinetriphosphatase, putative|Auto								7
5	gnl|lsbi|CPRT0000002575 Sjc_0027340|Sjp_0027340|SJC_S000166.102507 SJC_S000166.134491|Paramyosin (Antigen Sj97),putative|Auto								6
6	gnl|lsbi|CPRT0000005218 Sjc_0055410|Sjp_0055410|SJC_S000570.156339 SJC_S000570.181124|Granulins precursor (Proepithelin)(PEPI)								6
7	gnl|lsbi|CPRT0000010198 Sjc_0108340|Sjp_0108340|SJC_S005644.5832 SJC_S005644.7354|Lysosomal alpha-glucosidase precursor(EC 3.2.1.20) (Acid maltase), putative|Auto								5
8	gnl|lsbi|CPRT0000000689 Sjc_0007330|Sjp_0007330|SJC_S000023.398399 SJC_S000023.398995|Heat shock protein 83,putative|Auto								5
9	gnl|lsbi|CPRT0000004594 Sjc_0048760|Sjp_0048760|SJC_S000444.14563 SJC_S000444.29338|CDase; Ceramidase; ko:K01441N-acylsphingosine amidohydrolase, putative|Auto								4
10	tr|Q5C3C4|Q5C3C4_SCHJA SJCHGC05525 protein (Fragment) OS=Schistosoma japonicum PE=2 SV=2								4
11	gnl|lsbi|CPRT0000007855 Sjc_0083460|Sjp_0083460|SJC_S001708.6042 SJC_S001708.33983|glucan phosphorylase [EC:2.4.1.1];ko:K00688 starch phosphorylase, putative|Auto								4
12	gnl|lsbi|CPRT0000001131 Sjc_0012140|Sjp_0012140|SJC_S000050.345631 SJC_S000050.348383|T05E11.3; ko:K09487 heat shockprotein 90kDa beta, putative|Auto								4
13	gnl|lsbi|CPRT0000001673 Sjc_0017890|Sjp_0017890|SJC_S000087.94818 SJC_S000087.95712|97 kDa heat shock protein (Egg spermreceptor), putative|Auto								4
27A9-IP
1	gnl|lsbi|CPRT0000004184 Sjc_0044460|Sjp_0044460|SJC_S000371.120926 SJC_S000371.130293|Major vault protein (MVP),putative|Auto								25
2	gnl|lsbi|CPRT0000004202 Sjc_0044660|Sjp_0044660|SJC_S000376.59674 SJC_S000376.61833|HSP90AA1, HSPC1, HSPCA; heat shockprotein 90kDa alpha (cytosolic), class A member 1; ko:K04079 molecularchaperone HtpG, putative|Auto								24
3	gnl|Sjc_Ago2|Auto								21
4	gnl|lsbi|CPRT0000002575 Sjc_0027340|Sjp_0027340|SJC_S000166.102507 SJC_S000166.134491|Paramyosin (Antigen Sj97),putative|Auto								10
5	gnl|lsbi|CPRT0000004387 Sjc_0046600|Sjp_0046600|SJC_S000409.151803 SJC_S000409.165260|Gaa; glucosidase, alpha, acid[EC:3.2.1.20]; ko:K01187 alpha-glucosidase, putative|Auto								9
6	gnl|lsbi|CPRT0000010198 Sjc_0108340|Sjp_0108340|SJC_S005644.5832 SJC_S005644.7354|Lysosomal alpha-glucosidase precursor(EC 3.2.1.20) (Acid maltase), putative|Auto								6
7	tr|Q5C3C4|Q5C3C4_SCHJA SJCHGC05525 protein (Fragment) OS=Schistosoma japonicum PE=2 SV=2								6
8	gnl|lsbi|CPRT0000005218 Sjc_0055410|Sjp_0055410|SJC_S000570.156339 SJC_S000570.181124|Granulins precursor (Proepithelin)(PEPI)								6
9	gnl|lsbi|CPRT0000003373 Sjc_0035730|Sjp_0035730|SJC_S000251.218292 SJC_S000251.242715|zip; zipper; ko:K01509adenosinetriphosphatase, putative|Auto								6
10	gnl|lsbi|CPRT0000004594 Sjc_0048760|Sjp_0048760|SJC_S000444.14563 SJC_S000444.29338|CDase; Ceramidase; ko:K01441N-acylsphingosine amidohydrolase, putative|Auto								5
11	gnl|lsbi|CPRT0000000689 Sjc_0007330|Sjp_0007330|SJC_S000023.398399 SJC_S000023.398995|Heat shock protein 83,putative|Auto								5
12	gnl|lsbi|CPRT0000006433 Sjc_0068410|Sjp_0068410|SJC_S000909.834 SJC_S000909.14385|Cullin-associated NEDD8-dissociatedprotein 1 (Cullin-associated and neddylation-dissociated protein 1) (p120CAND1), putative|Auto								5
13	gnl|lsbi|CPRT0000001131 Sjc_0012140|Sjp_0012140|SJC_S000050.345631 SJC_S000050.348383|T05E11.3; ko:K09487 heat shockprotein 90kDa beta, putative|Auto								5
14	gnl|lsbi|CPRT0000007855 Sjc_0083460|Sjp_0083460|SJC_S001708.6042 SJC_S001708.33983|glucan phosphorylase [EC:2.4.1.1];ko:K00688 starch phosphorylase, putative|Auto								4
15	gnl|lsbi|CPRT0000001673 Sjc_0017890|Sjp_0017890|SJC_S000087.94818 SJC_S000087.95712|97 kDa heat shock protein (Egg spermreceptor), putative|Auto								4
~70-90kDa
Mock-IP
1	gnl|lsbi|CPRT0000000968 Sjc_0010400|Sjp_0010400|SJC_S000039.97756 SJC_S000039.99963|LOC555098; hypothetical proteinLOC555098; ko:K09490 heat shock 70kDa protein 5, putative|Auto								20
2	gnl|lsbi|CPRT0000004204 Sjc_0044680|Sjp_0044680|SJC_S000376.74992 SJC_S000376.79945|Heat shock 70 kDa protein cognate 4(Hsc 70-4), putative|Auto								18
3	gnl|lsbi|CPRT0000004202 Sjc_0044660|Sjp_0044660|SJC_S000376.59674 SJC_S000376.61833|HSP90AA1, HSPC1, HSPCA; heat shockprotein 90kDa alpha (cytosolic), class A member 1; ko:K04079 molecularchaperone HtpG, putative|Auto								10
4	gnl|lsbi|CPRT0000001446 Sjc_0015460|Sjp_0015460|SJC_S000071.108921 SJC_S000071.118410|Plastin-2 (L-plastin) (Lymphocytecytosolic protein 1) (LCP-1) (65 kDa macrophage protein) (pp65),putative|Auto								5
5	gnl|lsbi|CPRT0000002471 Sjc_0026230|Sjp_0026230|SJC_S000157.132996 SJC_S000157.135482|HSPA9B, HSPA9; heat shock 70kDaprotein 9B (mortalin-2); ko:K04043 molecular chaperone DnaK, putative|Auto								4
6	gnl|lsbi|CPRT0000000438 Sjc_0004640|Sjp_0004640|SJC_S000014.42956 SJC_S000014.49316|endoglycoceramidase [EC:3.2.1.123];ko:K05991 E3.2.1.123, putative|Auto								4
moIgG-IP
1	gnl|lsbi|CPRT0000004204 Sjc_0044680|Sjp_0044680|SJC_S000376.74992 SJC_S000376.79945|Heat shock 70 kDa protein cognate 4(Hsc 70-4), putative|Auto								14
2	gnl|lsbi|CPRT0000000968 Sjc_0010400|Sjp_0010400|SJC_S000039.97756 SJC_S000039.99963|LOC555098; hypothetical proteinLOC555098; ko:K09490 heat shock 70kDa protein 5, putative|Auto								12
3	gnl|lsbi|CPRT0000004202 Sjc_0044660|Sjp_0044660|SJC_S000376.59674 SJC_S000376.61833|HSP90AA1, HSPC1, HSPCA; heat shockprotein 90kDa alpha (cytosolic), class A member 1; ko:K04079 molecularchaperone HtpG, putative|Auto								8
4	gnl|lsbi|CPRT0000001446 Sjc_0015460|Sjp_0015460|SJC_S000071.108921 SJC_S000071.118410|Plastin-2 (L-plastin) (Lymphocytecytosolic protein 1) (LCP-1) (65 kDa macrophage protein) (pp65),putative|Auto								5
5	gnl|lsbi|CPRT0000002471 Sjc_0026230|Sjp_0026230|SJC_S000157.132996 SJC_S000157.135482|HSPA9B, HSPA9; heat shock 70kDaprotein 9B (mortalin-2); ko:K04043 molecular chaperone DnaK, putative|Auto								4
27A9-IP
1	gnl|lsbi|CPRT0000004204 Sjc_0044680|Sjp_0044680|SJC_S000376.74992 SJC_S000376.79945|Heat shock 70 kDa protein cognate 4(Hsc 70-4), putative|Auto								14
2	gnl|lsbi|CPRT0000000968 Sjc_0010400|Sjp_0010400|SJC_S000039.97756 SJC_S000039.99963|LOC555098; hypothetical proteinLOC555098; ko:K09490 heat shock 70kDa protein 5, putative|Auto								10
3	gnl|lsbi|CPRT0000004202 Sjc_0044660|Sjp_0044660|SJC_S000376.59674 SJC_S000376.61833|HSP90AA1, HSPC1, HSPCA; heat shockprotein 90kDa alpha (cytosolic), class A member 1; ko:K04079 molecularchaperone HtpG, putative|Auto								8
4	gnl|lsbi|CPRT0000001446 Sjc_0015460|Sjp_0015460|SJC_S000071.108921 SJC_S000071.118410|Plastin-2 (L-plastin) (Lymphocytecytosolic protein 1) (LCP-1) (65 kDa macrophage protein) (pp65),putative|Auto								5
5	gnl|lsbi|CPRT0000002471 Sjc_0026230|Sjp_0026230|SJC_S000157.132996 SJC_S000157.135482|HSPA9B, HSPA9; heat shock 70kDaprotein 9B (mortalin-2); ko:K04043 molecular chaperone DnaK, putative|Auto								4
a Proteins with peptide hits number > 3 were listed
